# Supplementary material for: A Reciprocal Transplant Experiment Confirmed Mite-Resistance in a Honey Bee Population from Uruguay
Source: MDPI journal article supplement (doi:10.3390/vetsci9110596), 2022-10-28
Supplement: s1 [file s1]

**Table S2.** The best fitted model for *Varroa destructor* infestation.

| Predictors                                       | Odds Ratios | CI        | Estimate    | Std. Error | p       |
|--------------------------------------------------|-------------|-----------|-------------|------------|---------|
| (Intercept)                                      | 0.08        | 0.07–0.09 | –2.517      | 0.06       | < 0.001 |
| A (R)                                            | 0.27        | 0.19–0.37 | –1.319      | 0.16       | < 0.001 |
| P (Mite-susceptible)                             | 7.30        | 5.88–9.07 | 1.988       | 0.11       | < 0.001 |
| C (Drone)                                        | 6.45        | 5.37–7.74 | 1.865       | 0.09       | < 0.001 |
| A (R) X P (Mite-susceptible)                     | 0.78        | 0.51–1.20 | –0.245      | 0.22       | 0.265   |
| A (R) X C (Drone)                                | 2.03        | 1.37–3.01 | 0.708       | 0.20       | < 0.001 |
| P (Mite-susceptible) X C (Drone)                 | 1.18        | 0.77–1.83 | 0.170       | 0.22       | 0.446   |
| A (R) X P (Mite-susceptible) X C (Drone)         | 2.30        | 1.01–5.24 | 0.833       | 0.42       | < 0.05  |
| Explained Deviance / Nagelkerke's R <sup>2</sup> |             |           | 0.219/0.293 |            |         |

A: Apiary with two levels, original population of mite-susceptible bees (Apiary S) or mite-resistant bees (Apiary R); C: Cell type with two levels, drone cells or worker cells; P: Mite-resistance bee population with two levels, mite-susceptible or mite-resistant bees.
