# Supplementary material for: A Reciprocal Transplant Experiment Confirmed Mite-Resistance in a Honey Bee Population from Uruguay
Source: MDPI journal article supplement (doi:10.3390/vetsci9110596), 2022-10-28
Supplement: s1 [file s1]

**Table S1.** Model selection for *Varroa destructor* infestation according to apiary and mite-resistance of the bee population through AIC and log ratio test (LRT).

| Model                                  | df | AIC     | Deviance | LRT     | p      |
|----------------------------------------|----|---------|----------|---------|--------|
| A + C + P + AxP + Px C + Ax C + AxPx C | 8  | 5851.04 |          | -2917.5 |        |
| A + C + P + AxP + Px C + Ax C          | 7  | 5853.07 | -4.03    | -2919.5 | 0.0446 |
| A + C + P + AxP + Px C                 | 6  | 5878.95 | -27.88   | -2933.5 | 0.0000 |
| A + C + P + AxP                        | 5  | 5886.56 | -9.61    | -2938.3 | 0.0019 |
| A + C + P                              | 4  | 5890.89 | -6.34    | -2941.4 | 0.0118 |
| A + P                                  | 3  | 6822.89 | -934.00  | -3408.4 | 0.0000 |
| A + C                                  | 3  | 6496.24 | -607.35  | -3245.1 | 0.0000 |
| P + C                                  | 3  | 6101.64 | -212.751 | 3047.8  | 0.0000 |
| P                                      | 2  | 7032.82 | -211.93  | -3514.4 | 0.0000 |
| A                                      | 2  | 7359.95 | -539.06  | -3678.0 | 0.0000 |
| C                                      | 2  | 6631.20 | -136.96  | -3313.6 | 0.0000 |

A: Apiary with two levels, original population of mite-susceptible bees (Apiary S) or mite-resistant bees (Apiary R); C: Cell type with two levels, drone cells or worker cells; P: Mite-resistance bee population with two levels, mite-susceptible or mite-resistant bees.
